# Supplementary material for: Influence of Genetic Variations in miRNA and Genes Encoding Proteins in the miRNA Synthesis Complex on Toxicity of the Treatment of Pediatric B-Cell ALL in the Brazilian Amazon
Source: MDPI journal article supplement (doi:10.3390/ijms24054431), 2023-02-23
Supplement: s1 [file s1]

**Supplementary Table S1. Single nucleotide variants (SNVs) of the 25 marker custom panel in miRNA genes and in genes encoding proteins essential for the synthesis of miRNAs.**

| <i>GENE</i>      | ID SNV     | Allelic Variation | MAF #   | Chromosomal location (GH38) * |
|------------------|------------|-------------------|---------|-------------------------------|
| <i>DROSHA</i>    | rs639174   | C/T               | T: 0.35 | Chr.5: 31433540               |
| <i>C5orf22</i>   | rs10035440 | C/T               | C: 0.18 | Chr.5: 31539356               |
| <i>MIR323B</i>   | rs56103835 | C/T               | C: 0.18 | Chr.14: 101056219             |
| <i>MIR2053</i>   | rs10505168 | C/T               | C: 0.35 | Chr.8: 112643523              |
| <i>DROSHA</i>    | rs3805500  | G/A               | G: 0.40 | Chr.5: 31462870               |
| <i>MIR300</i>    | rs12894467 | C/T               | C: 0.49 | Chr.14: 101041390             |
| <i>MIR146A</i>   | rs2910164  | C/G               | C: 0.29 | Chr.5: 160485411              |
| <i>MIR196A2</i>  | rs11614913 | C/T               | T: 0.38 | Chr.12: 53991815              |
| <i>MIR149</i>    | rs2292832  | T/C               | T: 0.41 | Chr.2: 240456086              |
| <i>AGO1</i>      | rs636832   | A/G               | A: 0.12 | Chr.1: 35897874               |
| <i>MIR200A</i>   | rs9660710  | C/A               | A: 0.07 | Chr.1: 1163962                |
| <i>KRT86</i>     | rs3660     | C/G               | G: 0.41 | Chr.12: 52286153              |
| <i>MIR219A1</i>  | rs213210   | A/G               | A: 0.23 | Chr.6: 33208047               |
| <i>MIR499A</i>   | rs3746444  | A/G               | G: 0.18 | Chr.20: 34990448              |
| <i>MIR608</i>    | rs4919510  | C/G               | G: 0.35 | Chr.10: 100975021             |
| <i>MIR605</i>    | rs2043556  | C/T               | T: 0.27 | Chr.10: 51299646              |
| <i>EFNA1</i>     | rs12904    | A/G               | A: 0.41 | Chr.1: 155134221              |
| <i>MIR938</i>    | rs2505901  | C/T               | C: 0.49 | Chr.10: 29602392              |
| <i>CSK</i>       | rs2168518  | A/G               | A: 0.24 | Chr.15: 74788737              |
| <i>MIRLET7A1</i> | rs10739971 | A/G               | A: 0.20 | Chr.9: 94175398               |
| <i>MIR219A1</i>  | rs107822   | C/T               | G: 0.47 | Chr.6: 33207798               |
| <i>NSRP1</i>     | rs6505162  | A/C               | C: 0.41 | Chr.17: 30117165              |
| <i>MIR604</i>    | rs2368392  | A/G               | A: 0.29 | Chr.10: 29545074              |
| <i>CTDSPL</i>    | rs7372209  | C/T               | T: 0.25 | Chr.3: 37969217               |
| <i>MIR100HG</i>  | rs1834306  | A/G               | A: 0.38 | Chr.11: 122152479             |

\* References to chromosomal locations were obtained from the GH38 version of the human genome obtained from the Human Genome Project; # Minor allele frequency.

**Picture Supplementary S1.** Hardy-Weinberg Equilibrium analysis of the investigated variants.

| <b>Variants</b> | <b>Hardy-Weinberg equilibrium<br/>(<i>p</i>-value)</b> |
|-----------------|--------------------------------------------------------|
| rs12904         | 0.4378                                                 |
| rs636832        | 0.8625                                                 |
| rs12894467      | 0.2769                                                 |
| rs3746444       | <b>0.0274*</b>                                         |
| rs213210        | 0.4209                                                 |
| rs107822        | 0.8371                                                 |
| rs4919510       | 0.8526                                                 |
| rs3805500       | 0.0880                                                 |
| rs10035440      | 0.2212                                                 |
| rs1834306       | 0.5554                                                 |
| rs2292832       | 0.2221                                                 |
| rs6505162       | <b>0.0005*</b>                                         |
| rs2043556       | <b>0.0269*</b>                                         |
| rs3660          | <b>&lt;0.0001*</b>                                     |
| rs2168518       | 0.6287                                                 |
| rs2910164       | <b>0.0238*</b>                                         |
| rs2368392       | <b>0.0033*</b>                                         |
| rs2505901       | 0.9222                                                 |
| rs639174        | 0.6357                                                 |
| rs7372209       | 0.1576                                                 |
| rs10505168      | 0.1567                                                 |
| rs9660710       | 0.5329                                                 |
| rs10739971      | <b>0.0002*</b>                                         |
| rs11614913      | 0.2298                                                 |
| rs56103835      | <b>0.0430*</b>                                         |

\* Genetic Variants in Hardy Weinberg Disequilibrium
